# Supplementary material for: In vivo haploid induction leads to increased frequency of twin-embryo and abnormal fertilization in maize
Source: BMC Plant Biol. 2018 Nov 29;18:313. doi: 10.1186/s12870-018-1422-2 (PMC6267813; doi:10.1186/s12870-018-1422-2)
Supplement: Supplementary file 1 — Frequency of twin-embryo kernels among 20 different inbred lines. The number of tested kernels, twin embryos and frequency of twin embryos among 20 different inbred lines after maternal haploid induction. (XLSX 9 kb) [file 12870_2018_1422_MOESM1_ESM.xlsx]

## Sheet: Sheet1
Additional file 1: Frequency of twin-embryo kernels among 20 different inbred lines
Female parent	Kernels tested (N)	Twin embryos	Frequency (%)	Female parent	Kernels tested (N)	Twin embryos	Frequency (%)
4F1	5296	15	0.28	Tie7922	2361	1	0.04
Dan360	8813	13	0.15	Ji846	2701	1	0.04
GY923	5816	10	0.17	Lv28	2104	1	0.05
Longkang11	2326	3	0.13	Qi319	3541	1	0.03
BY815	5531	2	0.04	Zheng58	2314	1	0.04
B73	2298	2	0.09	Jing24	1786	1	0.06
Ye107	2651	2	0.08	Ye478	3497	1	0.03
Yu87-1	2139	2	0.09	Mo17	3467	2	0.06
8112	3928	2	0.05
