# Supplementary material for: In vivo haploid induction leads to increased frequency of twin-embryo and abnormal fertilization in maize
Source: BMC Plant Biol. 2018 Nov 29;18:313. doi: 10.1186/s12870-018-1422-2 (PMC6267813; doi:10.1186/s12870-018-1422-2)
Supplement: Supplementary file 2 — Frequency of twin-embryo kernels among some specific inbred lines. Frequency of twin-embryo kernels among some specific inbred lines induced by both CAUHOI and CAU5. (XLSX 10 kb) [file 12870_2018_1422_MOESM2_ESM.xlsx]

## Sheet: Sheet1
Additional file 4: Frequency of twin-embryo kernels among some specific inbred lines
Female parent	inducer	Kernels tested (N)	Twin embryos	Frequency (%)
BY815	CAUHOI	4426	1	0.000225938
	CAU5	1105	1	0.000904977
Dan360	CAUHOI	4449	3	0.000674309
	CAU5	3199	9	0.00281338
Ye8112	CAUHOI	5334	2	0.000374953
	CAU5	1058	2	0.00189036
Tie7922	CAUHOI	2361	1	0.000423549
	CAU5	825	1	0.00121212
